# Supplementary material for: Beyond building damage: estimating and understanding non-recovery following disasters
Source: Research Square preprint supplement (doi:10.21203/rs.3.rs-275410/v1), 2021-02-25
Supplement: Supplementary file 1 [file 161e5ea97849293251025806.pdf]

**Table SI.1.** Initial set of variables used for predicting non-recovery, after removing highly-correlated variables. Those indicated with \* are included in the final non-recovery model in Nepal.

| Description                                                  | Units                                                                                              | Name              | Source                                                                | Citation              |
|--------------------------------------------------------------|----------------------------------------------------------------------------------------------------|-------------------|-----------------------------------------------------------------------|-----------------------|
| *Remoteness to municipal headquarters                        | Hours                                                                                              | remoteMunic       | World Bank Global Equity Practice                                     | <a href="#">27</a>    |
| *Modeled population density in 2015                          | Number of people per 100m grid                                                                     | popn2015_wp       | Worldpop                                                              | <a href="#">59</a>    |
| *Tree cover in 30 minute radius                              | Average % tree cover in 30 minute walking distance from grid                                       | trcvr_buff        | Global Forest Watch                                                   | <a href="#">57,69</a> |
| *Topographic Slope                                           | Degrees                                                                                            | slopedeg          | CGIAR                                                                 | <a href="#">60</a>    |
| *Shaking intensity                                           | Modified mercalli intensity                                                                        | MMI_usgs          | United States Geological Survey                                       | <a href="#">55,70</a> |
| *Rainfall-triggered landslide hazard                         | Relative landslide hazard triggered by extreme 24hr rainfall                                       | lndslid_HZ_rf_mr  | British Geological Survey                                             | <a href="#">56</a>    |
| Earthquake-triggered landslide hazard                        | Relative landslide hazard triggered by earthquake with a 10% probability of exceedance in 50 years | lndslid_HZ_EQ_mr  | British Geological Survey                                             | <a href="#">56</a>    |
| Precipitation during monsoon season (for drought likelihood) | Standardized difference from precipitation levels from 1980-2014                                   | msn_prctdiff_2015 | CHIRPS: Rainfall Estimates from Rain Gauge and Satellite Observations | <a href="#">71</a>    |
| Precipitation during dry season (for drought likelihood)     | Standardized difference from precipitation levels from 1980-2015                                   | dry_prctdiff_2015 | CHIRPS: Rainfall Estimates from Rain Gauge and Satellite Observations | <a href="#">71</a>    |
| International wealth index                                   | International wealth index                                                                         | IWI_mn_2011       | World Bank Global Equity Practice                                     | <a href="#">72</a>    |
| *Food insecurity                                             | Food poverty prevalence per local government unit                                                  | FII_P2            | World Bank Global Equity Practice                                     | <a href="#">58</a>    |
| Population size                                              | Number of people per ward                                                                          | n_tot             | Central Bureau of Statistics, Nepal                                   | <a href="#">34</a>    |
| Livelihood - wage employment                                 | Percentage of population conducting wage work per ward                                             | p_wagework        | Central Bureau of Statistics, Nepal                                   | <a href="#">34</a>    |
| Livelihood - agricultural employment                         | Percentage of population conducting agricultural work per ward                                     | p_agwork          | Central Bureau of Statistics, Nepal                                   | <a href="#">34</a>    |
| Livelihood - female migrant work                             | Percentage of population who are females of migrant age per ward                                   | p_femaleworker    | Central Bureau of Statistics, Nepal                                   | <a href="#">34</a>    |
| Livelihood - male migrant work                               | Percentage of population who are males of migrant age per ward                                     | p_maleworker      | Central Bureau of Statistics, Nepal                                   | <a href="#">34</a>    |

|                                                                                                                                                               |                                                                    |               |                                     |                    |
|---------------------------------------------------------------------------------------------------------------------------------------------------------------|--------------------------------------------------------------------|---------------|-------------------------------------|--------------------|
| Roof type                                                                                                                                                     | Percentage of houses with thatch roof per ward                     | p_thatchroof  | Central Bureau of Statistics, Nepal | <a href="#">34</a> |
| Load-bearing structure type                                                                                                                                   | Percentage of houses with mud brick load-bearing walls per ward    | p_mudbrick    | Central Bureau of Statistics, Nepal | <a href="#">34</a> |
| Surveyed population density                                                                                                                                   | Population per area per ward                                       | pop_dens      | Central Bureau of Statistics, Nepal | <a href="#">34</a> |
| Age                                                                                                                                                           | Average age per ward                                               | avg_age       | Central Bureau of Statistics, Nepal | <a href="#">34</a> |
| Female head of household                                                                                                                                      | Percentage of female head of households per ward                   | p_fhh         | Central Bureau of Statistics, Nepal | <a href="#">34</a> |
| Gender                                                                                                                                                        | Male to female sex ratio per ward                                  | sex_ratio     | Central Bureau of Statistics, Nepal | <a href="#">34</a> |
| Literacy                                                                                                                                                      | Percentage of population who are literate per ward                 | p_literate    | Central Bureau of Statistics, Nepal | <a href="#">34</a> |
| Electricity access                                                                                                                                            | Percentage of households with electricity for lighting per ward    | p_elect_light | Central Bureau of Statistics, Nepal | <a href="#">34</a> |
| *Water infrastructure                                                                                                                                         | Percentage of households with tap water per ward                   | p_tap         | Central Bureau of Statistics, Nepal | <a href="#">34</a> |
| Information access - phone                                                                                                                                    | Percentage of population with mobile phones per ward               | p_mobph       | Central Bureau of Statistics, Nepal | <a href="#">34</a> |
| Information access - radio                                                                                                                                    | Percentage of population with radio per ward                       | p_radio       | Central Bureau of Statistics, Nepal | <a href="#">34</a> |
| Information access - television                                                                                                                               | Percentage of population with television per ward                  | p_tv          | Central Bureau of Statistics, Nepal | <a href="#">34</a> |
| Language                                                                                                                                                      | Percentage of population who speak mother tongue (Nepali) per ward | p_mothtongue  | Central Bureau of Statistics, Nepal | <a href="#">34</a> |
| Low, Dalit caste group (Kami, Damai/Dholi, Sarki, Badi, Gaine, Chamar/Harijan, Musahar, Dushad/Paswan, Tatma, Khatwe, Dhobi, Baantar, Chidimar, Dom, Halkhor) | Percentage of population in Dalit caste group per ward             | p_Dalit       | Central Bureau of Statistics, Nepal | <a href="#">34</a> |
| Disability                                                                                                                                                    | Percentage of population who are not disabled                      | p_notdisabled | Central Bureau of Statistics, Nepal | <a href="#">34</a> |

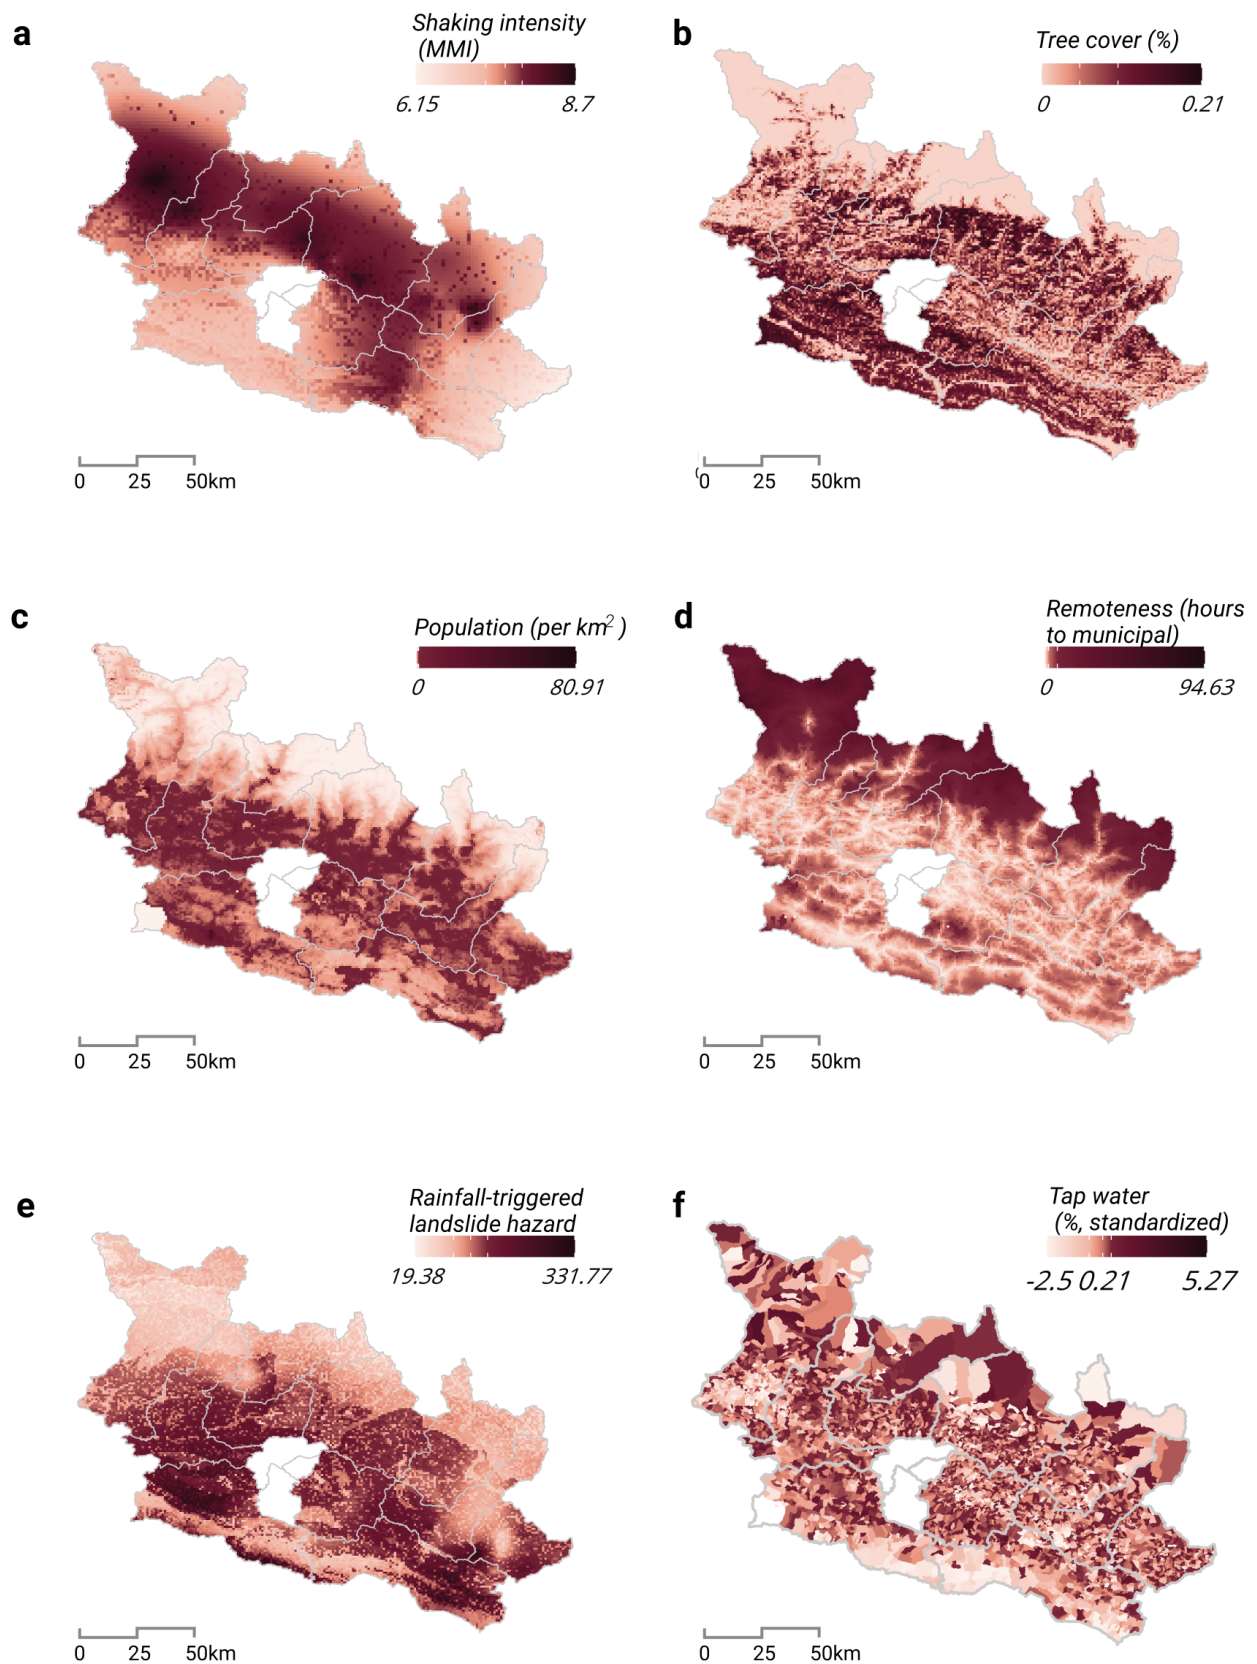

**Figure SI.1. Maps of final predictors used to estimate the spatial distribution of non-recovery in Nepal.** Maps are shown at original scale (also listed in Table SI.1) and colors represent the quantiles of the distribution to highlight spatial distribution of values. Maps are ordered in order of importance in the model.

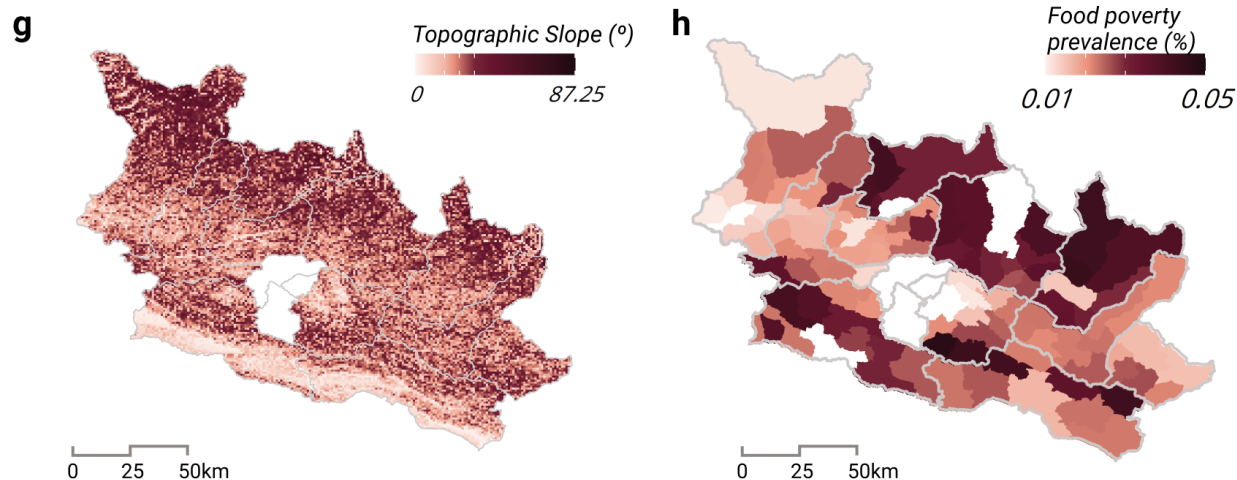

**Figure SI.1. Maps of final predictors (continued).** Maps are shown at original scale (also listed in Table SI.1) and colors represent the quantiles of the distribution to highlight spatial distribution of values. Maps are ordered in order of importance in the model.

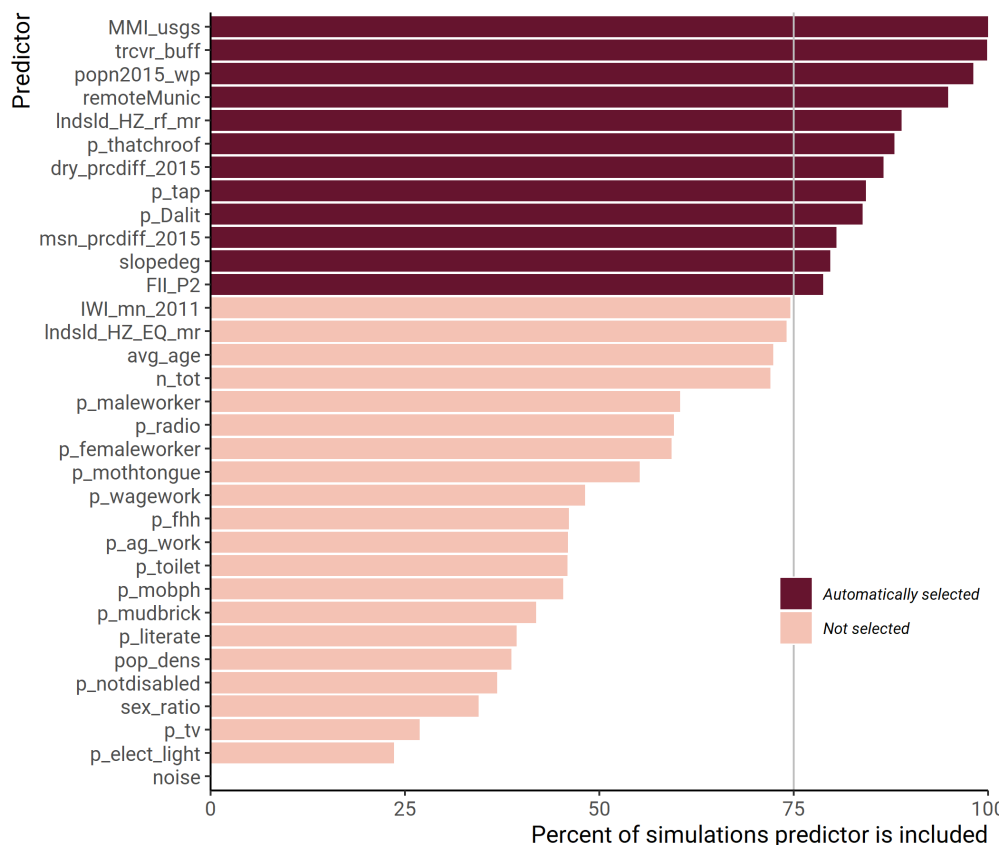

**Figure SI.2.** Percentage of 1000 simulations that each predictor was selected in random forest model. Each simulation used different bootstrapped samples as training data. Each simulation selects variables that are more predictive than a random noise variable. In the final model, we include only the variables that occurred for at least 75% of the simulations, then manually remove variables whose relationships were not supported in the literature.

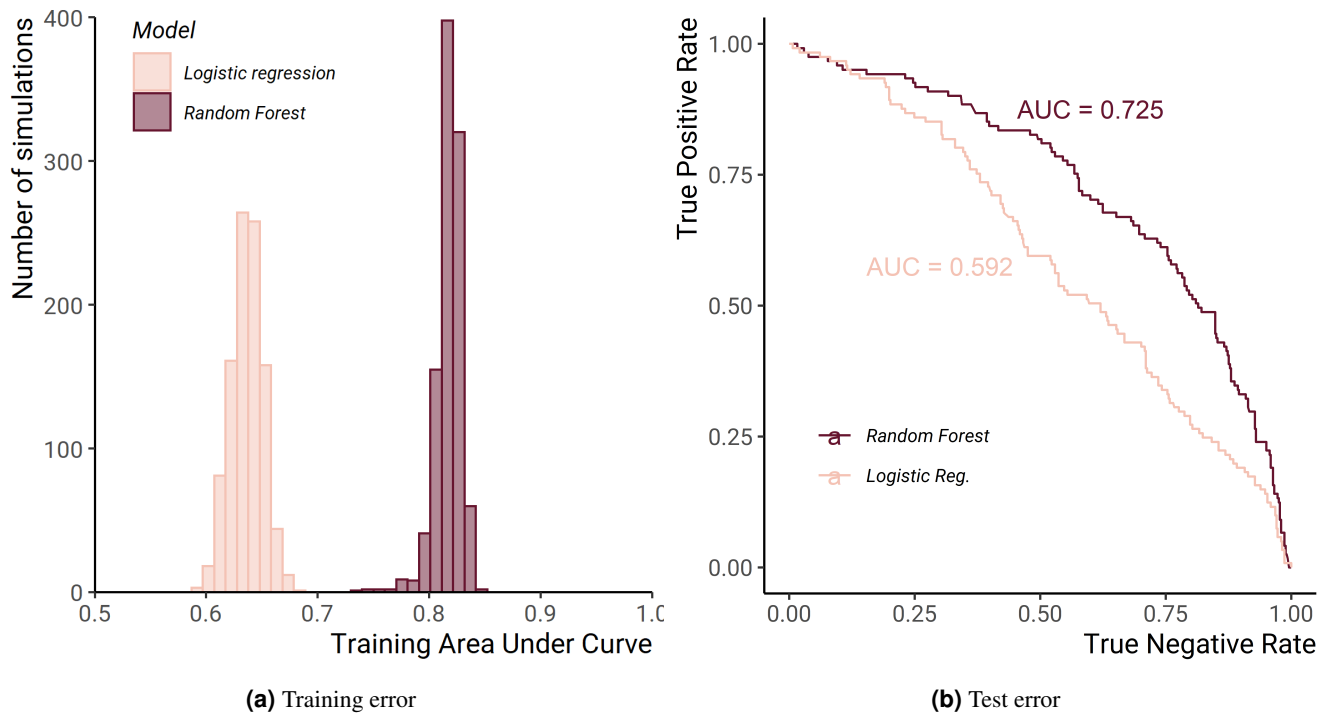

**Figure SI.3. Training and test errors for models to predict non-recovery.** (a) Histogram of area under the curve for 1000 simulations using logistic regression and random forest models. Random forest was selected as the final model due to better performance, or higher area under the curve. (b) The final random forest model applied to the test data has an area under the curve of 0.725, which is slightly worse than the training error, as expected, but better than the logistic regression.
